# Supplementary material for: Glycyl-L-Prolyl-L-Glutamate Pseudotripeptides for Treatment of Alzheimer’s Disease
Source: MDPI journal article supplement (doi:10.3390/biom11010126), 2021-01-19
Supplement: s1 [file s1]

## Supplementary Materials

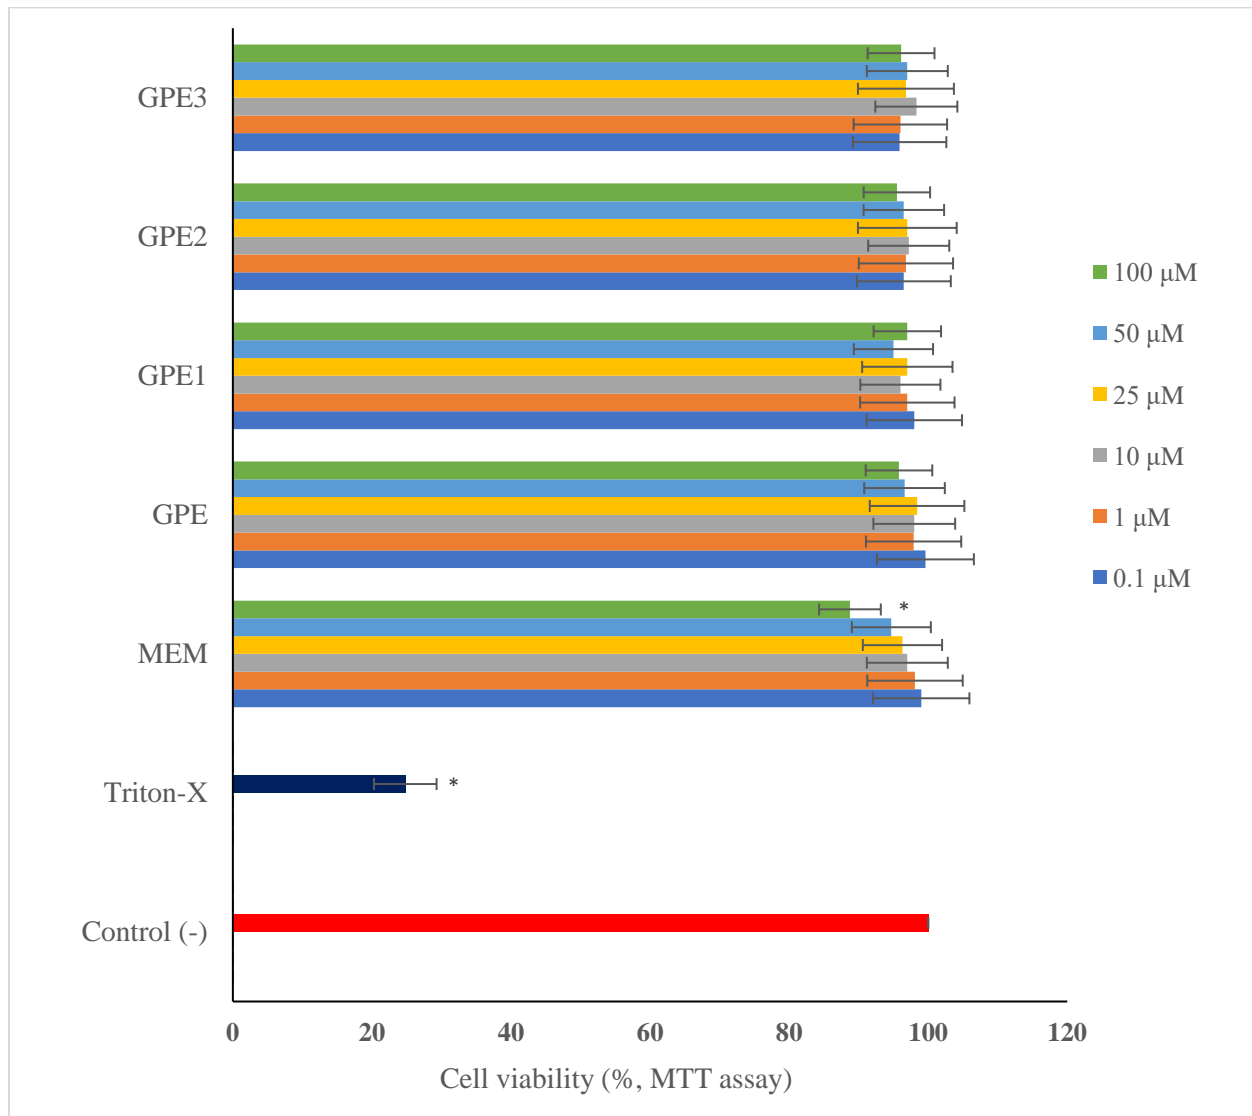

**Figure 1.** The effects of GPE, MEM, GPE1, GPE2 and GPE3 on cell viability rates in differentiated SHSY5Y cells (MTT assay; % Cell viability). Symbol (\*) represents statistically significant ( $p < 0.05$ ) decrease in cell viability as compared to negative control (control-) group.

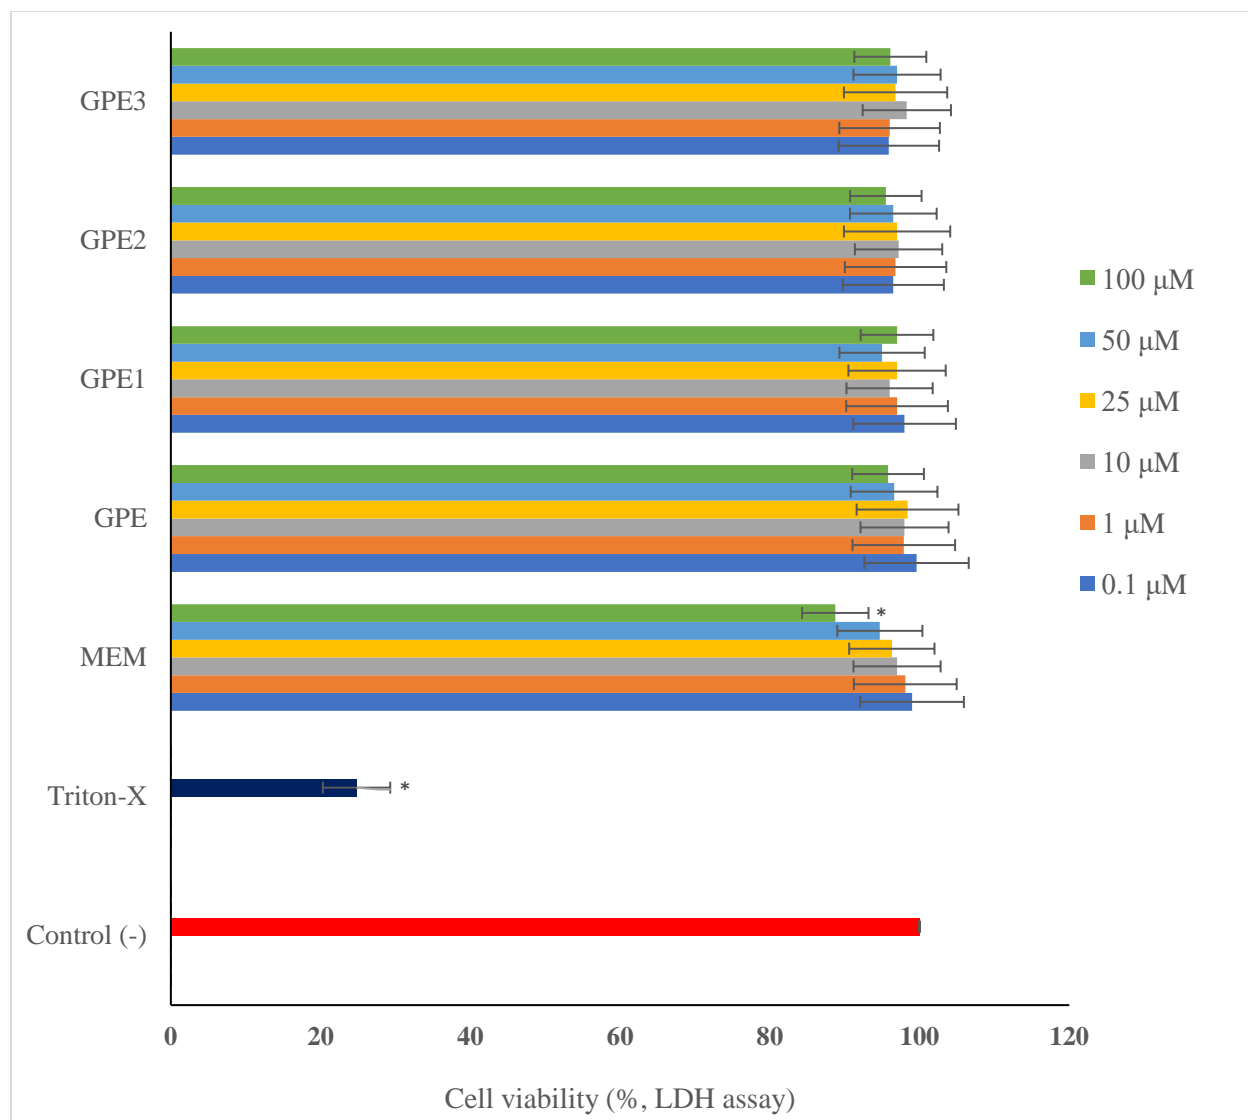

**Figure S2.** The effects of GPE, MEM, GPE1, GPE2 and GPE3 on cell viability rates in differentiated SHSY5Y cells (LDH assay; % Cell viability). Symbol (\*) represents statistically significant ( $p < 0.05$ ) decrease in cell viability as compared to negative control (control-) group.
